# Supplementary material for: The lactate sensor GPR81 regulates glycolysis and tumor growth of breast cancer
Source: PubMed Central journal article supplement (PMC9012857; doi:10.1038/s41598-022-10143-w), 2022-04-15
Supplement: 41598_2022_10143_MOESM1_ESM.pdf [file 41598_2022_10143_MOESM1_ESM.pdf]

## Supplementary Information

### **The lactate sensor GPR81 regulates glycolysis and tumor growth of breast cancer**

Shota Ishihara<sup>1,2</sup>, Kenji Hata<sup>1\*</sup>, Katsutoshi Hirose<sup>3</sup>, Tatsuo Okui<sup>4</sup>, Satoru Toyosawa<sup>3</sup>, Narikazu Uzawa<sup>2</sup>, Riko Nishimura<sup>1</sup> and Toshiyuki Yoneda<sup>1\*</sup>

1 Department of Molecular and Cellular Biochemistry, Osaka University Graduate School of Dentistry, 1-8 Yamadaoka, Suita, Osaka 565-0871, Japan

2 Department of Oral and Maxillofacial Surgery II, Osaka University Graduate School of Dentistry, Osaka, Japan

3 Department of Oral Pathology, Osaka University Graduate School of Dentistry, Osaka, Japan

4 Department of Oral and Maxillofacial Surgery, Shimane University Faculty of Medicine, Izumo, Shimane 693-8501, Japan

\*Corresponding Author:

**Supplementary Table S1**

| GroupID | Term       | Description                                                             | LogP  | Log(q-value) | Symbols                                                                                                                                                                                                                                                  |
|---------|------------|-------------------------------------------------------------------------|-------|--------------|----------------------------------------------------------------------------------------------------------------------------------------------------------------------------------------------------------------------------------------------------------|
| 1       | GO:2000147 | positive regulation of cell motility                                    | -7.63 | -3.61        | AGT,CD40,COL1A1,CTSH,DEFB1,F3,ICAM1,IL1R1,NEDD9,PDGFRB,PGF,PLCG2,RARRES2,SNAI1,TGFB2,CXCR4,SEMA5A,PDPN,CEMIP,VSIR,DDRKG1,SEMA6D,JAG1,COL15A1,DLX3,HPGD,PDE3B,SERPINF1,RORA,SPINT1,ISM1,BMPER,EVL,ITGB4,S100P                                             |
| 2       | GO:0045598 | regulation of fat cell differentiation                                  | -6.19 | -2.58        | JAG1,CEBPA,LPL,RARRES2,RORA,TRIB3,CCDC3,TLCD3B,ZBTB7C,FNDC5,INHBB                                                                                                                                                                                        |
| 3       | GO:0002456 | T cell mediated immunity                                                | -6.07 | -2.53        | JAG1,CTSH,HLA-B,HLA-DRA,HLA-DRB1,ICAM1,IL1R1,IL7R,CADM1,SERPINB9,TGFB2,ADA,BCL3,CD40,RORA,TMEM98,CSF2,PBX1,PLCG2,VCAM1,DHRS2,IKZF3,VSIR,GPRC5B,INAVA,CEBPA,COL1A1,NEDD9,PDE3B,PTPRA,TGM2,CXCR4,SEMA5A,PTPRU,PDPN,F3,GPCPD1,PDGFRB,THBD,CST7,CRACR2A,CD14 |
| 4       | GO:0001934 | positive regulation of protein phosphorylation                          | -5.93 | -2.46        | ADORA1,AGT,CD40,CSF2,HLA-DRB1,ICAM1,INHBB,NEDD9,PDGFRB,PGF,PLCG2,RARRES2,TGFB2,MAGED1,GDF15,LEFTY1,MAPRE3,GPRC5B,GPRC5C,CEMIP,DDRKG1,AFAP1L2,EEF1A2,TRIB3,SLC1A3,TMPRSS3,CEBPA,COL1A1,F3,PTPRA,ADAMTS3,KIF16B,MVB12B,SLC43A2                             |
| 5       | GO:0030277 | maintenance of gastrointestinal epithelium                              | -5.85 | -2.44        | MUC2,TFF1,TFF2,TFF3,INAVA,ADORA1,ATP2B2,CHRNA1,CTSH,RAB3D,ILDR2,FLG,CXCR4                                                                                                                                                                                |
| 6       | GO:1901652 | response to peptide                                                     | -5.30 | -2.01        | JAG1,AGT,CD40,COL1A1,ICAM1,INHBB,LPL,PDE3B,SERPINF1,PTPRA,RARRES2,TFF1,VCAM1,GLP2R,GDF15,INAVA,TRIB3,CTSH,PGF,SERPINB9,SSTR5,DDRKG1,SLC1A3,TGM2,RRAGD,ZCCHC3,ANKRD1,ADA,SLC6A19                                                                          |
| 7       | GO:0031347 | regulation of defense response                                          | -5.26 | -2.01        | ADA,ADORA1,AGT,CEBPA,HLA-B,HLA-DRB1,IL1R1,LPL,SERPINF1,SERPINB9,PLCG2,RORA,TGM2,CST7,CADM1,ABHD12,GPRC5B,APOBEC3G,ZCCHC3,THBD,SEMA5A,SEMA6D,KREMEN1,CSF2                                                                                                 |
| 8       | GO:0001819 | positive regulation of cytokine production                              | -5.15 | -2.01        | AGT,BCL3,CD14,CD40,CSF2,F3,IL1R1,LPL,PLCG2,RORA,CADM1,GPRC5B,NLRP2,INAVA,AFAP1L2,ZCCHC3,CEBPA,PDGFRB,PGF,RARRES2,TGM2,THBD,CXCR4,SEMA5A,HLA-B,HLA-DRB1,INHBB,TGFB2,VSIR                                                                                  |
| 9       | GO:0009611 | response to wounding                                                    | -4.83 | -1.84        | CD40,COL1A1,F2RL2,F3,INHBB,ITGB4,PDGFRB,PLCG2,SLC1A3,TGFB2,THBD,CXCR4,MYL9,PDPN,KREMEN1,RTN4RL2,ANXA8,ADA,ADORA1,FLG                                                                                                                                     |
| 10      | GO:0008083 | growth factor activity                                                  | -4.72 | -1.81        | JAG1,AGT,CSF2,INHBB,PGF,TFF1,TGFB2,GDF15,LEFTY1,COL1A1,HPGD,NEO1,PDGFRB,SPINT1,VCAM1,ADAMTS3,ANKRD1,C20orf27,KIF16B,CHRD1,BMPER,ELAPOR2,SEMA5A,SEMA6D,FNDC5,MTRNR2L1                                                                                     |
| 11      | GO:0070482 | response to oxygen levels                                               | -4.69 | -1.81        | ADA,ADORA1,COL1A1,ICAM1,PDGFRB,PGF,RORA,TGFB2,VCAM1,CXCR4,ARNT2,PDPN,ANKRD1,LPL,NNMT,SLC1A3,FZD3,SLC12A5,ITGB4,PDE3B,AGT,ATP2B2,INHBB,KCNU12,SNTA1,TFF2,CST7,MYL9,WASF3,TMEM98,ADD2,IL1R1,RARRES2,SLC1A4,SLC16A2                                         |
| 12      | GO:0052547 | regulation of peptidase activity                                        | -4.57 | -1.70        | AGT,CSNK2A1,CTSH,DAPK1,F3,SERPINA5,SERPINF1,SERPINB9,SPINT1,CST7,NLRP2,VSIR,DDRKG1,ANXA8,ANXA8L1,CEBPA,TMEM98,TRIB3,TGFB2                                                                                                                                |
| 13      | GO:0089718 | amino acid import across plasma membrane                                | -4.31 | -1.51        | AGT,SLC1A3,SLC1A4,SLC16A2,SLC43A2,ADORA1,PDPN,SLC6A19,SLC26A10,SLCO2A1,KCNU12,SLC12A5,SLC37A1,TTYH2,ATP2B2,ABCG1                                                                                                                                         |
| 14      | GO:0019216 | regulation of lipid metabolic process                                   | -4.26 | -1.49        | ADORA1,AGT,EEF1A2,PDE3B,PDGFRB,PLCG2,RARRES2,RORA,SNAI1,ABCG1,TRIB3,CCDC3                                                                                                                                                                                |
| 15      | GO:0051960 | regulation of nervous system development                                | -4.20 | -1.45        | CRABP2,SERPINF1,SPINT1,CDKL5,TGM2,CXCR4,FZD3,CST7,SEMA5A,WASF3,DAAM2,TMEM98,SEMA6D,ELAPOR2,NEDD9,AGT,CHRNA1,PDGFRB,PTGFRN,TGFB2,ATRN,GDF15,AUTS2,SLC12A5,ICAM1,LZTS3,PDPN,ANKRD1,EVL,KREMEN1,RTN4RL2,CSNK2A1,CDH11,COL15A1,NEO1,SLC1A3,ITGB4             |
| 16      | GO:0034330 | cell junction organization                                              | -4.10 | -1.41        | ADD2,AGT,CDH11,CHRNA1,GPC4,ITGB4,PTPRA,SNAI1,SNTA1,CDKL5,TGFB2,PPFIBP2,LZTS3,WASF3,ADGRL1,SHANK2,INAVA,LRFN1                                                                                                                                             |
| 17      | GO:0010718 | positive regulation of epithelial to mesenchymal transition             | -3.95 | -1.32        | JAG1,COL1A1,SNAI1,TGFB2,PDPN,CRABP2,FLG,HLA-DRB1,KRT83,FZD3,ELAPOR2,PDGFRB,HPGD,SEMA5A,SEMA6D,CEBPA,BMPER                                                                                                                                                |
| 18      | GO:0051345 | positive regulation of hydrolase activity                               | -3.91 | -1.30        | AGT,CD40,CTSH,DAPK1,F3,ICAM1,NEDD9,PDGFRB,RASGRF1,CDKL5,TGM2,NLRP2,RALGAPA2,SIPA1L2,VSIR,DDRKG1                                                                                                                                                          |
| 19      | GO:1905114 | cell surface receptor signaling pathway involved in cell-cell signaling | -3.78 | -1.25        | ADORA1,CHRNA1,COL1A1,CSNK2A1,GPC4,MPP2,PLCG2,FZD3,SEMA5A,PTPRU,DAAM2,GPRC5B,RNF43,NXN,KREMEN1                                                                                                                                                            |
| 20      | GO:0009617 | response to bacterium                                                   | -3.71 | -1.19        | BCL3,CD14,CD40,CSF2,DEFB1,HLA-B,HLA-DRB1,HPGD,ICAM1,IL7R,SERPINB9,PLCG2,RARRES2,THBD,VCAM1,IKZF3,ANKRD1,INAVA,CEBPA,COL1A1,RORA,CCDC3,AGT,SLC1A3,CXCR4,ABHD12,IL1R1,LPL,SERPINF1,SSTR5,DDRKG1,IGFBPL1                                                    |

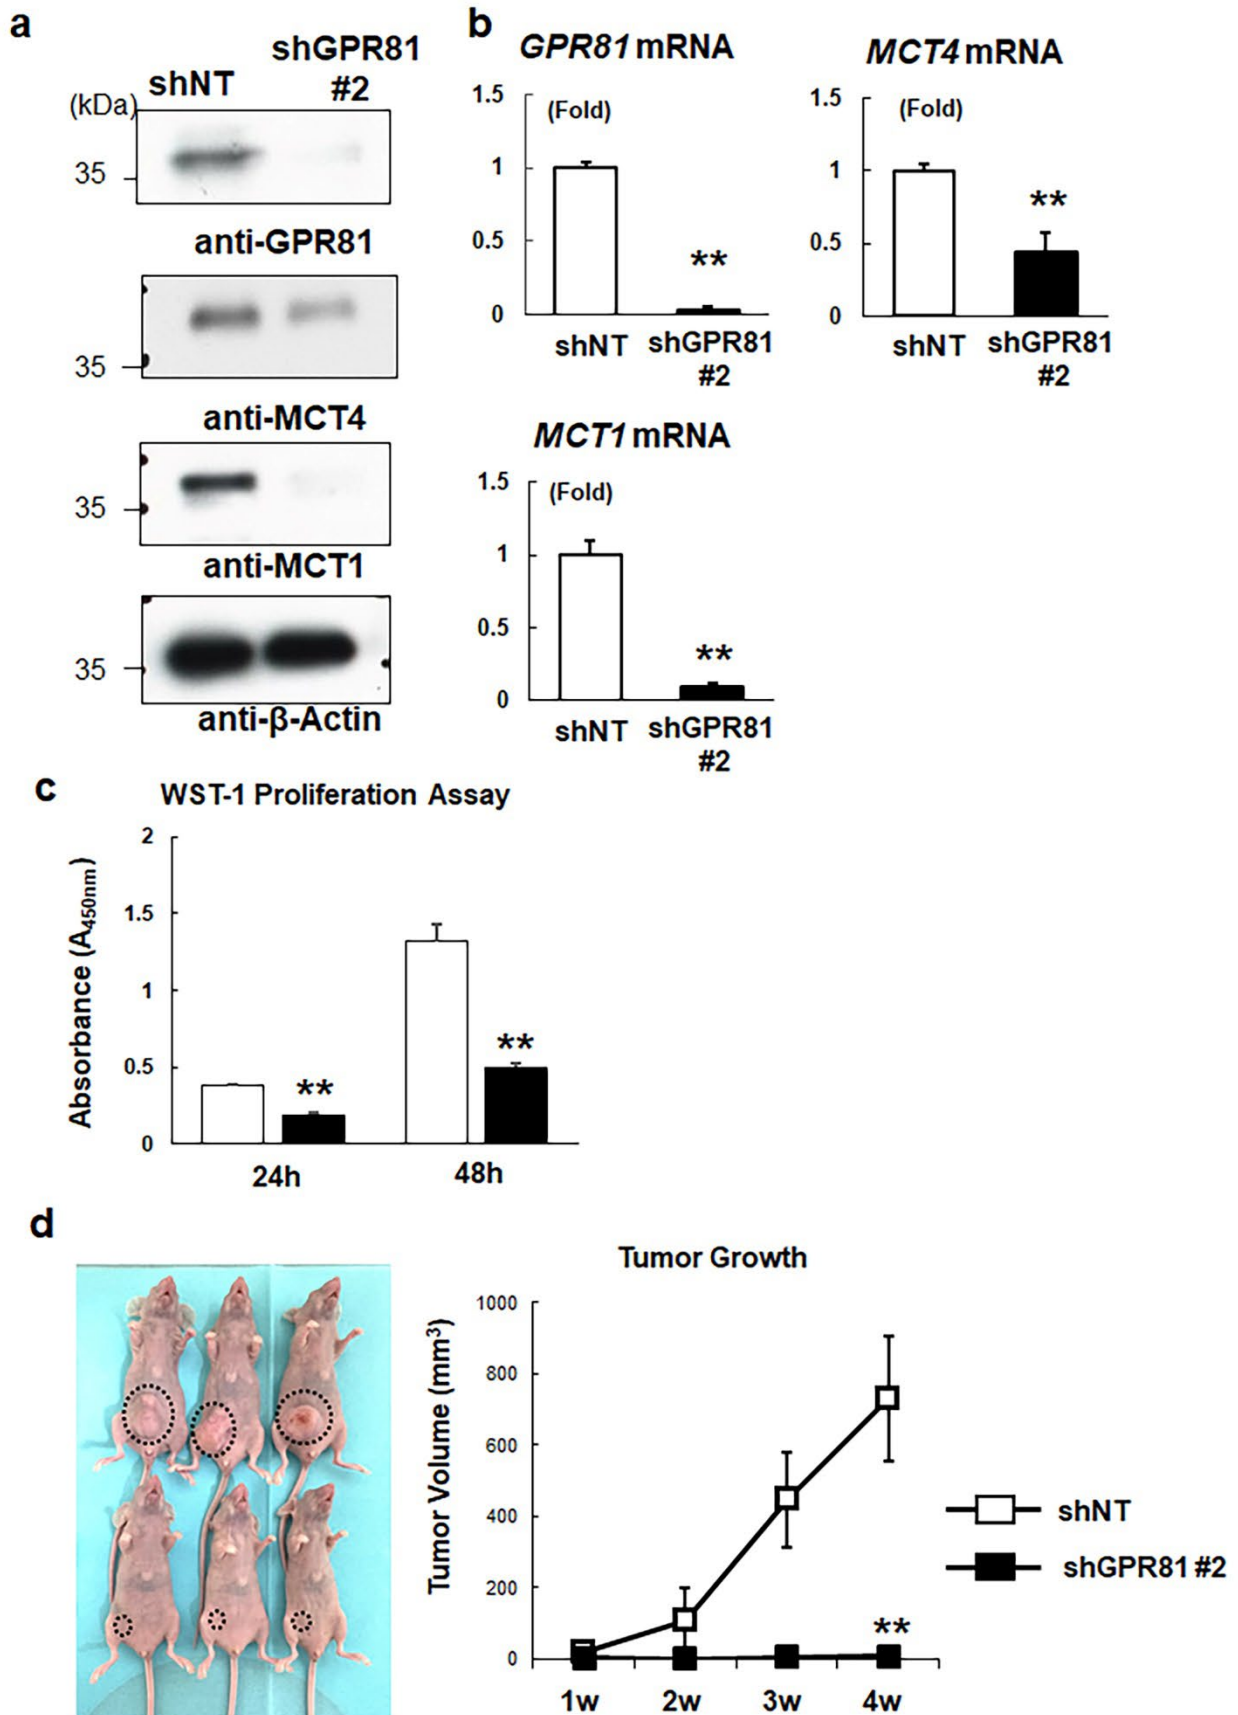

**Supplementary Figure S1. Stable knockdown of GPR81 in MDA-MB-231 cells inhibited cell proliferation *in vitro* and *in vivo*.** Using a lentiviral system, GPR81 was stably knocked down in MDA-MB-231 cells with short hairpin (sh)GPR81 #2 RNA and compared with cells containing scrambled shRNA as a control (shNT). Knockdown of GPR81 was confirmed by (a) western blotting and (b) RT-qPCR. The *GPR81*, *MCT1*, and *MCT4* mRNA levels in the shGPR81 #2 cells are presented as the fold increase compared with that of shNT cells. Data are presented as the means  $\pm$  s.d. ( $n = 3$ /group).  $**p < 0.01$ ; Student's *t*-test. (c) ShNT and shGPR81 #2 cells were cultured in 96 well plates, and cell proliferation was measured using the WST-1 Proliferation Assay Kit ( $n = 5$ /group).  $**p < 0.01$  (vs. shNT cells); Student's *t*-test. (d) Representative images of MDA-MB-231 shNT and shGPR81 #2 xenografts at 4 weeks after tumor cell injection (left). Tumor volumes of shNT and shGPR81 #2 xenografts were measured over a period of 4 weeks after cell injection (right;  $n = 5$ /group).  $**p < 0.01$  (vs. shNT cells); Student's *t*-test.

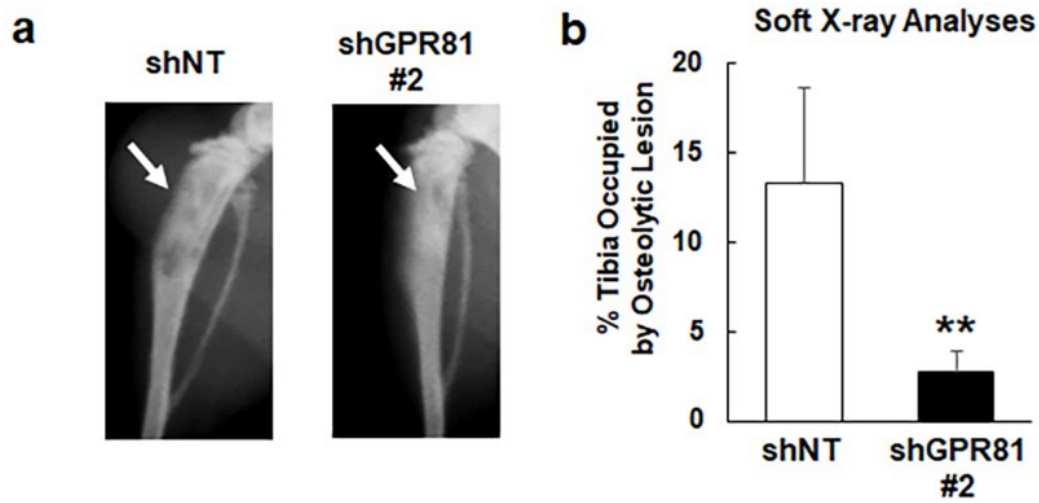

**Supplementary Figure S2. Impaired osteolytic tumor growth of shGPR81 #2 MDA-MB-231 cells.** (a) Soft X-ray analysis of the hind limbs of mice after bone marrow injections with  $1 \times 10^5$  shNT or shGPR81 #2 cells. The arrowheads indicate the osteolytic lesions. (b) Osteolytic destruction was quantified by measuring the areas of the osteolytic lesions in digital X-ray images. The data are presented as the percentage of the tibia occupied by osteolytic lesions ( $n = 7 \sim 9$  mice/group). \*\* $p < 0.01$  (vs. shNT cells); Student's t-test.

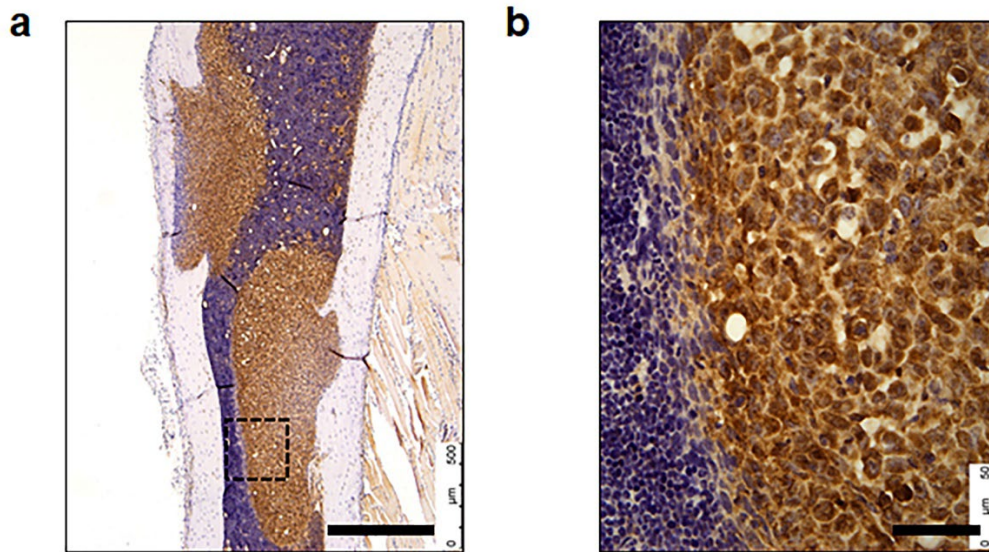

**Supplementary Figure S3.** The expression of GPR81 in shNT MDA-MB-231 cells (a) The expression of GPR81 in hindlimbs injected with  $1 \times 10^5$  shNT MDA-MB-231 cells. Note that GPR81 was strongly expressed in shNT MDA-MB-231 cells in the tibia. Scale bar: 100  $\mu\text{m}$  (b) High magnification image of the dashed box in (a). Scale bar: 50  $\mu\text{m}$ .

Supplementary Figure S4

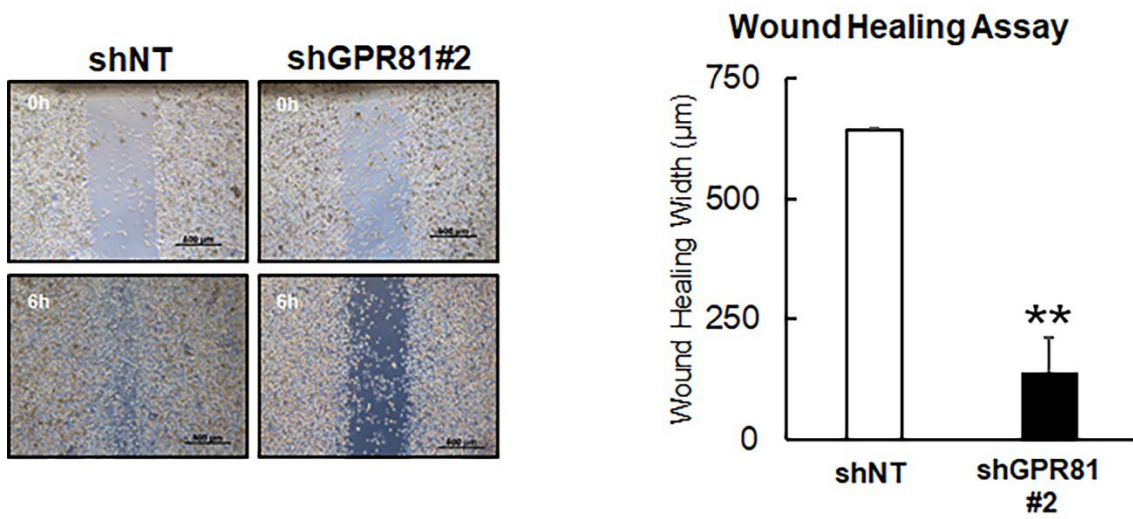

**Supplementary Figure S4. Impaired cell motility and invasion by shGPR81 cells.** Wound-healing assays for shNT and shGPR81 #2 cells. Monolayers of shNT and shGPR81 #2 cells were scratched, and the distances between the edges of the scratches were measured 12 h after scratching. The data are expressed as the wound healing widths of the original wound that contained migrating cells ( $n = 3/\text{group}$ ).  $**p < 0.01$  (vs. shNT); Student's  $t$ -test.



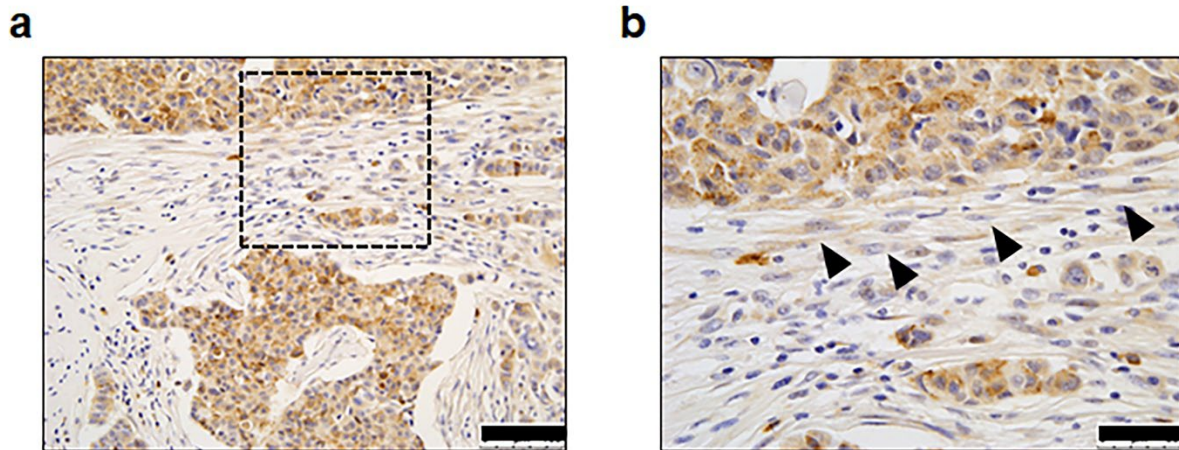

**Supplementary Figure S5. The expression of GPR81 in human breast cancer (a)** The expression of GPR81 in human breast cancer was determined by immunohistochemistry using human tissue arrays. Scale bar: 100  $\mu\text{m}$ . **(b)** High magnification image of the dashed box in (a). The arrowheads indicate the stromal cells with weak GPR81 expression. Scale bar: 50  $\mu\text{m}$ .



Figure 1 a

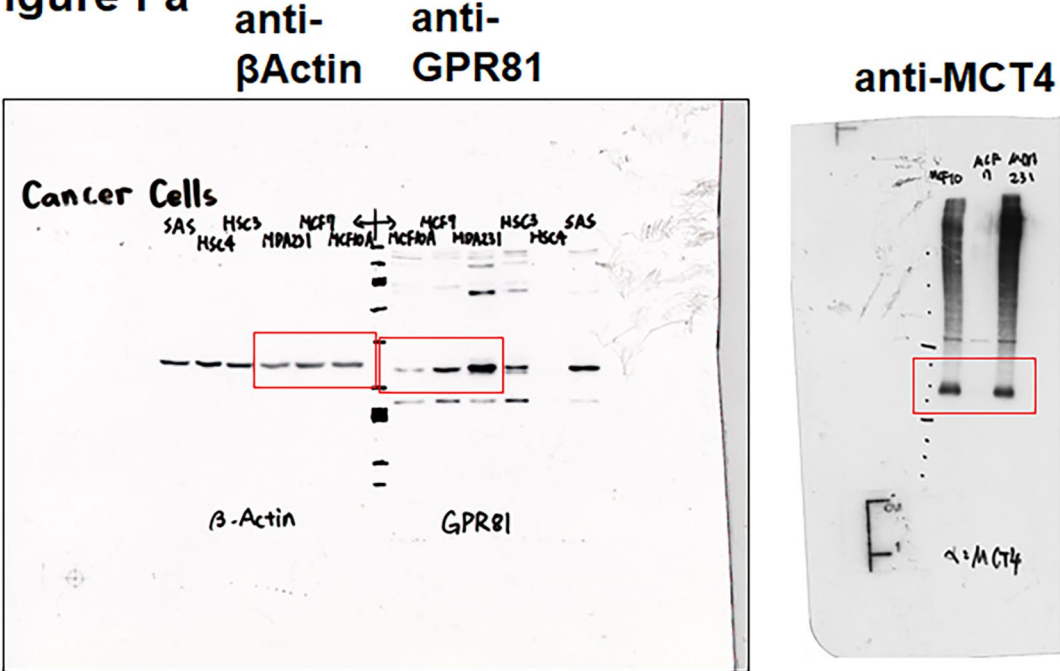

anti-MCT1

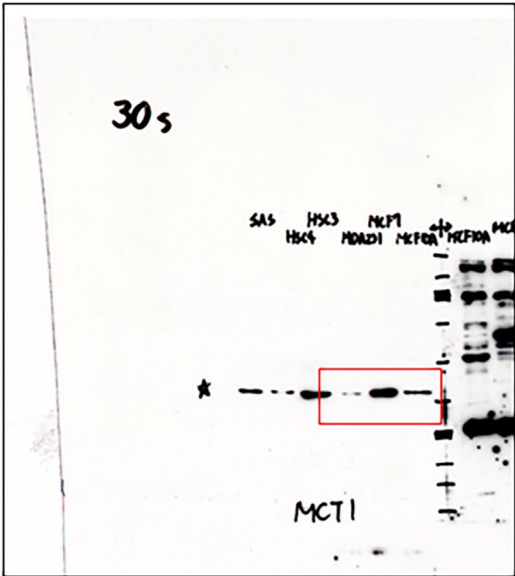

Exposure Time 30s

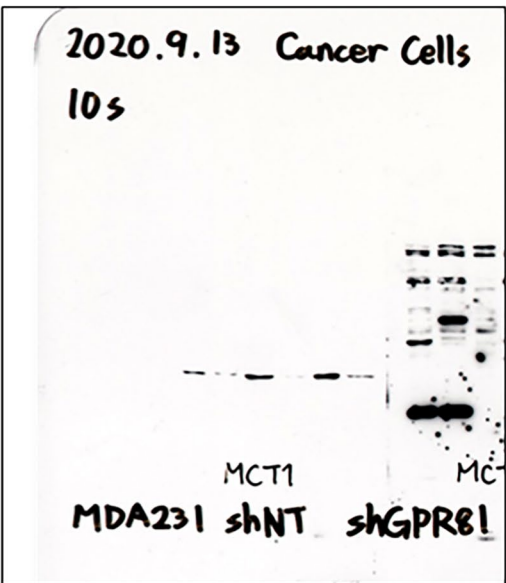

Exposure Time 10s

Figure 2 a

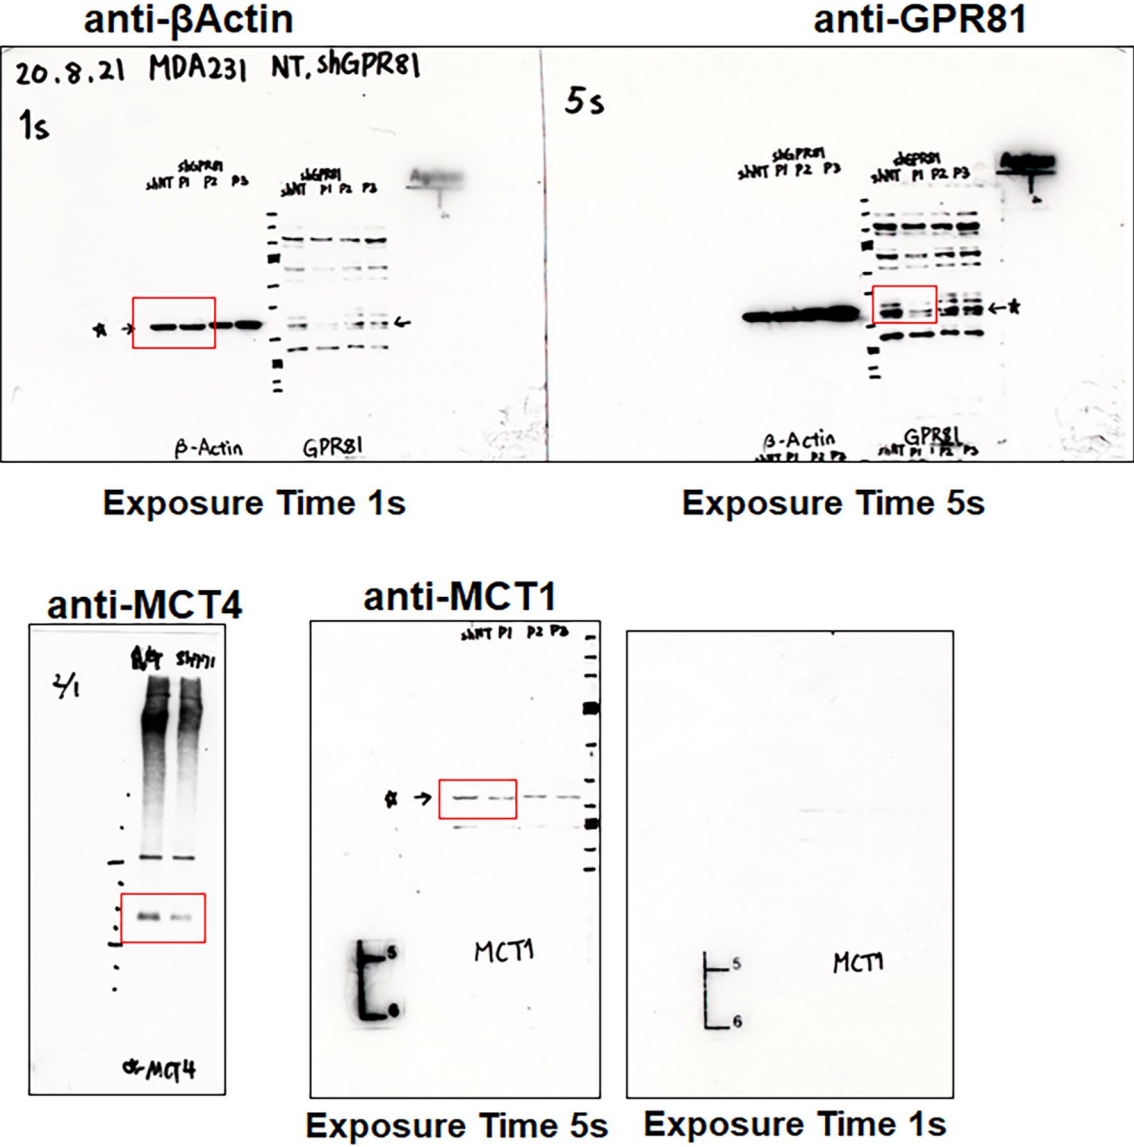

Figure 4b

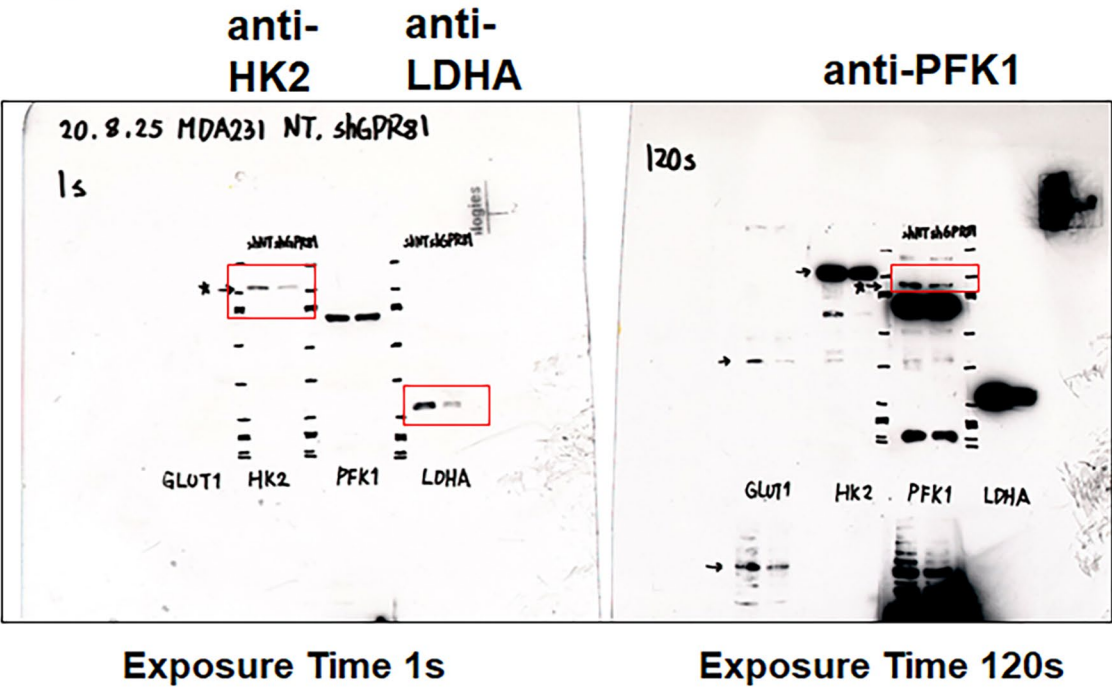

anti-βActin

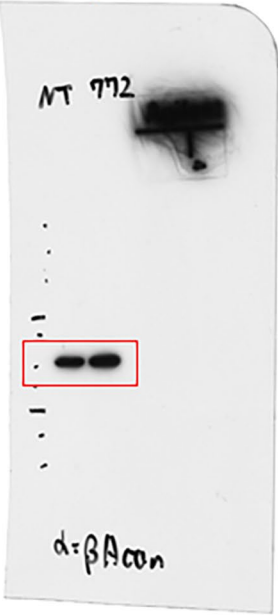

# Supplementary Figure S1a

anti- $\beta$ Actin    anti-GPR81

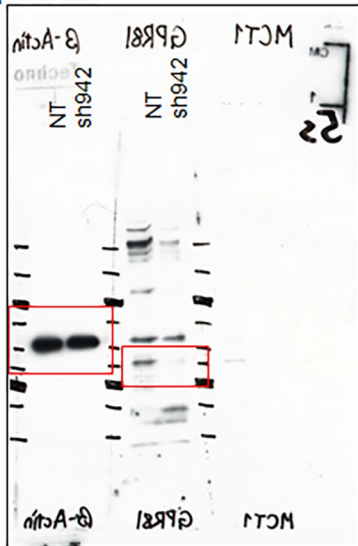

Exposure Time 5s

anti-MCT1

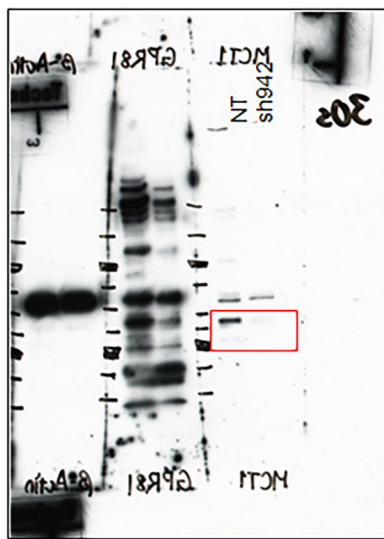

Exposure Time 30s

anti-MCT4

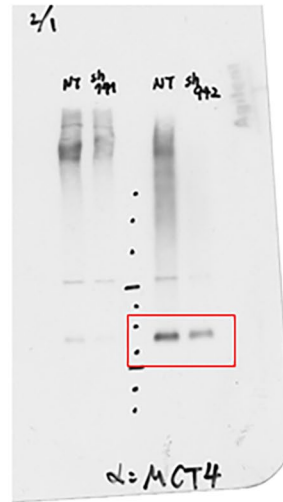

**Supplementary Figure S6.** Uncropped western blots for Figures 1, 2, 4, and Supplementary Figure S1. The original immunoblots for the main and supplementary figures are shown. The red frames indicate the bands that are shown in the corresponding figures.
